# Supplementary material for: Megakaryocytic Leukemia 1 (MKL1) Regulates Hypoxia Induced Pulmonary Hypertension in Rats
Source: PubMed Central journal article supplement (PMC3960100; doi:10.1371/journal.pone.0083895), 2014-03-19
Supplement: pone.0083895.s001.pdf [file pone.0083895.s001.pdf]

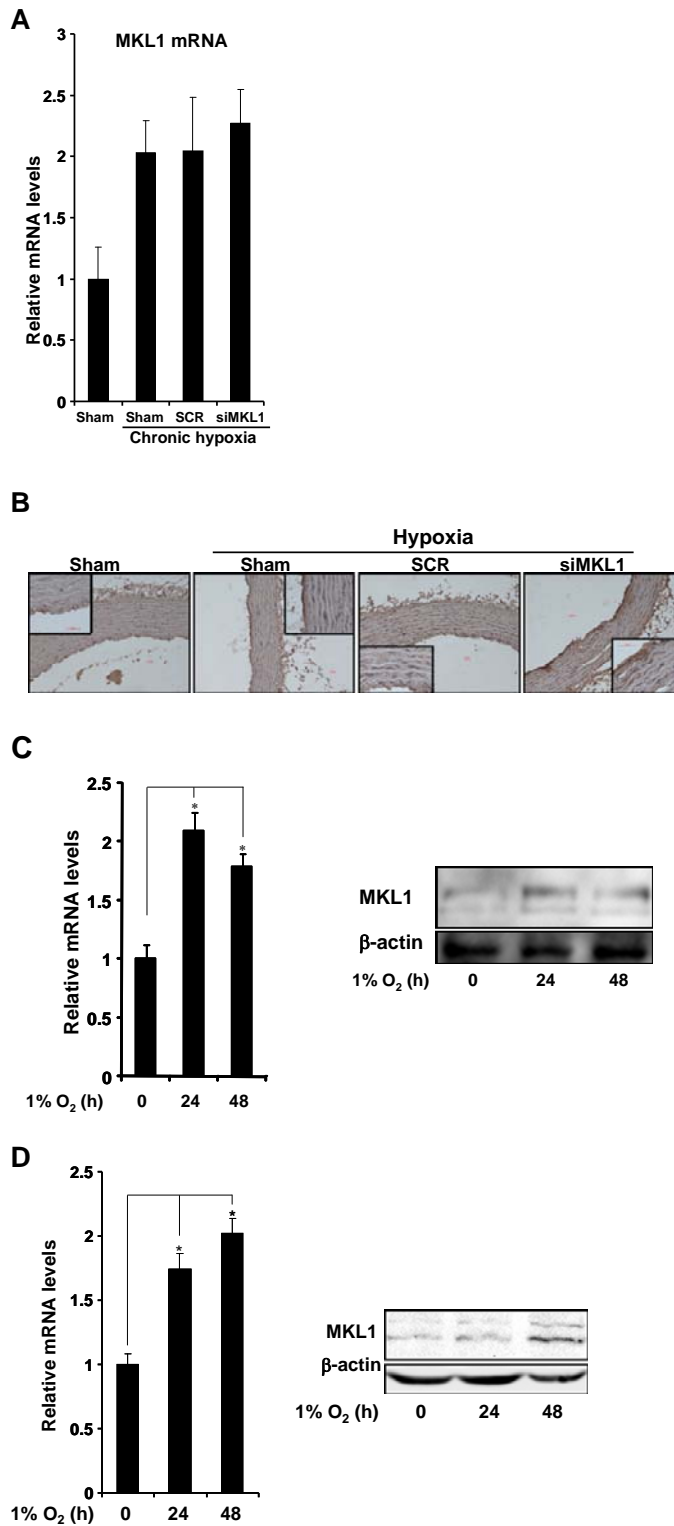

**Figure S1:** (A, B) Sprague Dawley rats were injected with lentiviral particles carrying shRNA targeting MKL1 or random shRNA (SCR) and induced to develop HPH as described under *Methods*. MKL1 mRNA (A) and protein (B) levels in aortic arteries were assessed by qPCR and immunohistochemistry. N=5 mice for each group (C, D) A10 cells (C) and HPASMCs (D) were exposed to 1% O<sub>2</sub> and harvested at indicated time points. mRNA and protein levels of MKL1 were measured by qPCR and Western.
