# Supplementary material for: Megakaryocytic Leukemia 1 (MKL1) Regulates Hypoxia Induced Pulmonary Hypertension in Rats
Source: PubMed Central journal article supplement (PMC3960100; doi:10.1371/journal.pone.0083895), 2014-03-19
Supplement: pone.0083895.s002.pdf [file pone.0083895.s002.pdf]

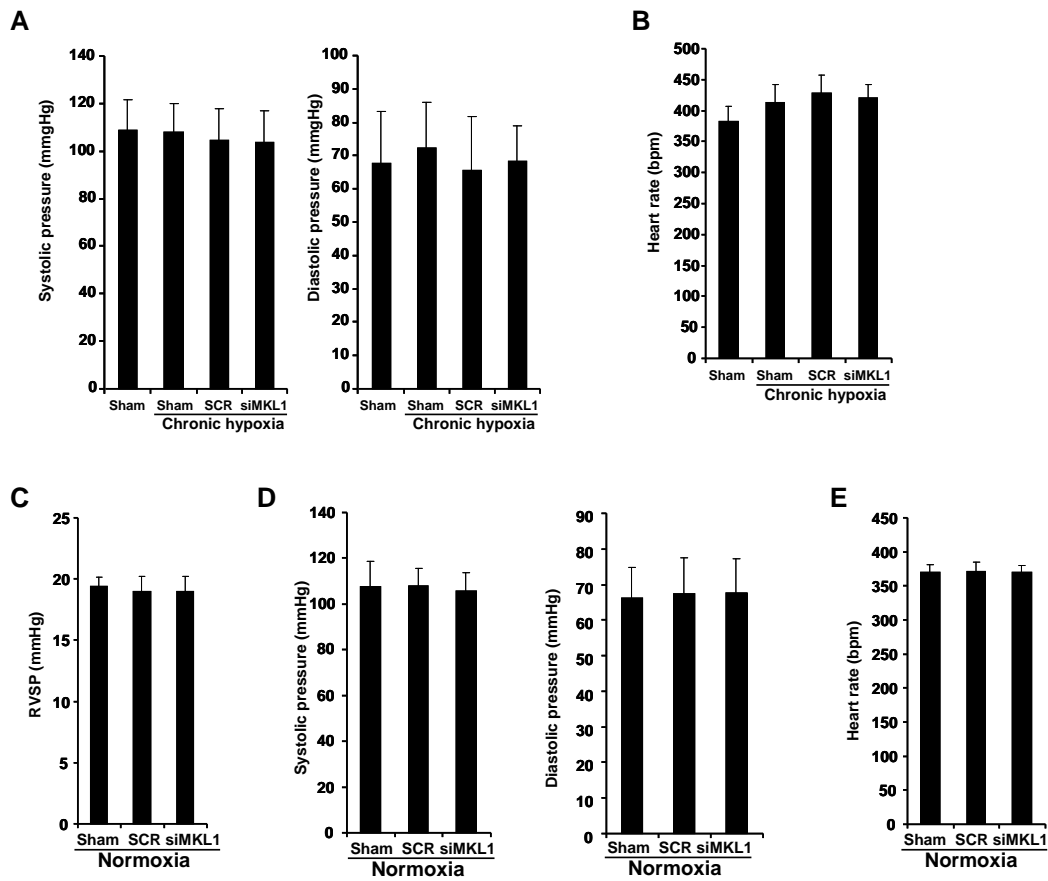

**Figure S2: (A, B)** Sprague Dawley rats were injected with lentiviral particles carrying shRNA targeting MKL1 or random shRNA (SCR) and induced to develop HPH as described under *Methods*. Systemic blood pressure (A) and heart rate (B) were measured by using the PowerLab data acquisition system. N=5 mice for each group **(C-E)** Sprague Dawley rats were injected with lentiviral particles carrying siMKL1 or SCR and maintained under normoxic conditions for 4 weeks. Pulmonary arterial pressure (C), systemic blood pressure (D), and heart rate (E) were recorded. N=5 mice for each group
