# Supplementary material for: Megakaryocytic Leukemia 1 (MKL1) Regulates Hypoxia Induced Pulmonary Hypertension in Rats
Source: PubMed Central journal article supplement (PMC3960100; doi:10.1371/journal.pone.0083895), 2014-03-19
Supplement: pone.0083895.s003.pdf [file pone.0083895.s003.pdf]

**Table 1: Real-time quantitative PCR primers:**

| Gene                         | Species | Sequence                                                            | NCBI reference number | Amplicon size (bp) |
|------------------------------|---------|---------------------------------------------------------------------|-----------------------|--------------------|
| fibronectin                  | rat     | Forward: GACTCGCTTTGACTTCACCAC<br>Reverse: GCTGAGACCCAGGAGACCAC     | NM_019143.2           | 150                |
| TGF- $\beta$                 | rat     | Forward: TAATGGTGGACCCGAACAACG<br>Reverse: GGCACTGCTTCCCGAATGTCT    | NM_021578.2           | 100                |
| Collagen type I $\alpha$ 1   | rat     | Forward: TACAGCACGCTTGTGGATGG<br>Reverse: CAGATTGGGATGGAGGGAGTT     | NM_053304.1           | 194                |
|                              | human   | Forward: TGCGATGACGTGATCTGTGA<br>Reverse: TTGGTCGGTGGGTGACTCTG      | NM_000088.3           | 108                |
| Collagen type I $\alpha$ 2   | rat     | Forward: TGACCAGCCTCGCTCACAG<br>Reverse: CAATCCAGTAGTAATCGCTCTTCCA  | NM_053356.1           | 185                |
|                              | human   | Forward: ATGCCTAGCAACATGCCAATC<br>Reverse: CAGCAAAGTCCCACCGAGA      | NM_000089.3           | 185                |
| MKL1                         | rat     | Forward: TCACCCACTCAGTTCTTTCTCA<br>Reverse: GACTTCGGTTGGCTTTGCTT    | XM_001077101.3        | 179                |
|                              | human   | Forward: GGCTTGAGGAACCATTTTCCT<br>Reverse: ACCCCCACTTCTCTGCTGAA     | NM_020831.3           | 91                 |
| $\beta$ -actin               | rat     | Forward: GACGTTGACATCCGTAAAGACC<br>Reverse: CTAGGAGCCAGGGCAGTAATCT  | NM_031144.3           | 113                |
|                              | human   | Forward: CAGTCGGTTGGAGCGAGCAT<br>Reverse: GGA CTTCCTGTAACAACGCATCTC | NM_001101.3           | 116                |
| Collagen type III $\alpha$ 1 | rat     | Forward: CCTCCCAGAACATTACATACCAC<br>Reverse: GACTGTCTTGCTCCATTCACCA | NM_032085.1           | 194                |
